# Supplementary material for: Synthesis and Modeling Studies of Furoxan Coupled Spiro-Isoquinolino Piperidine Derivatives as NO Releasing PDE 5 Inhibitors
Source: PubMed Central journal article supplement (PMC7277557; doi:10.3390/biomedicines8050121), 2020-05-14

## Supplementary File 1

$^1\text{H}$ NMR,  $^{13}\text{C}$  NMR and HMRMS, mass spectra of compound at different steps of the synthesis.

Mass spectra of **3**

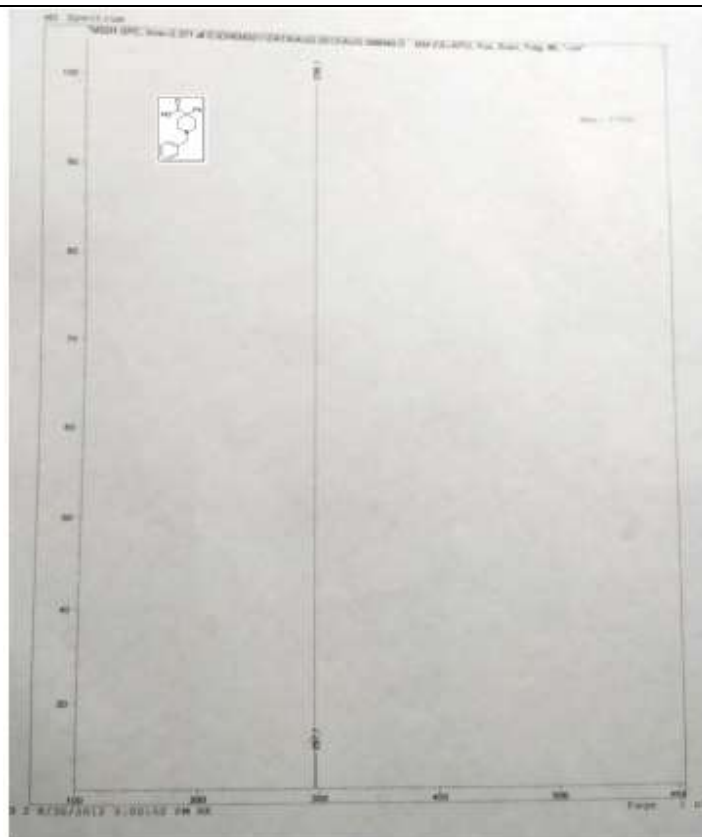

Mass spectra of 6

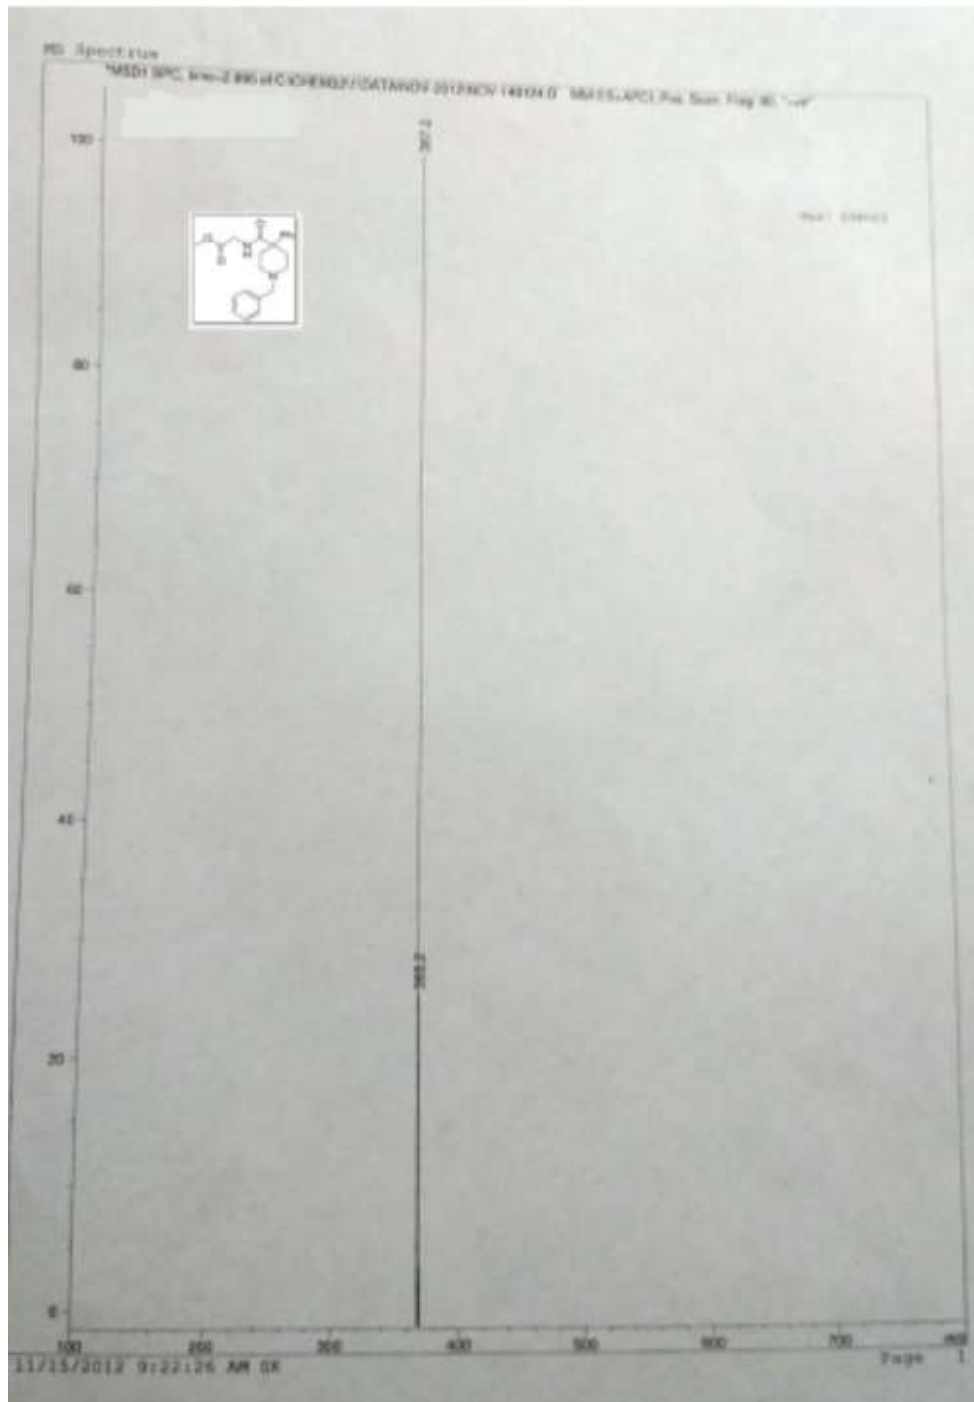

Mass spectra of 7

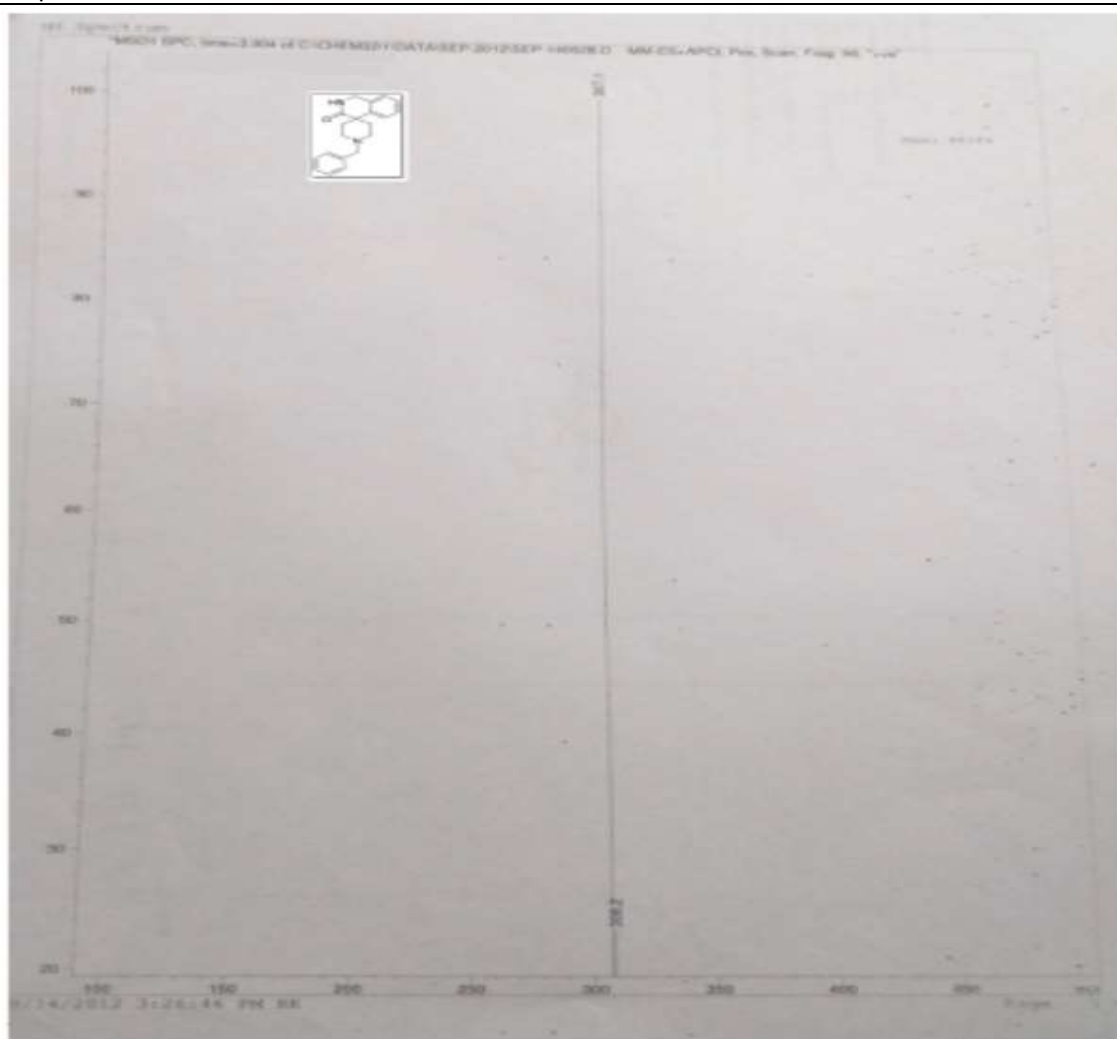

1H NMR spectra of **7**

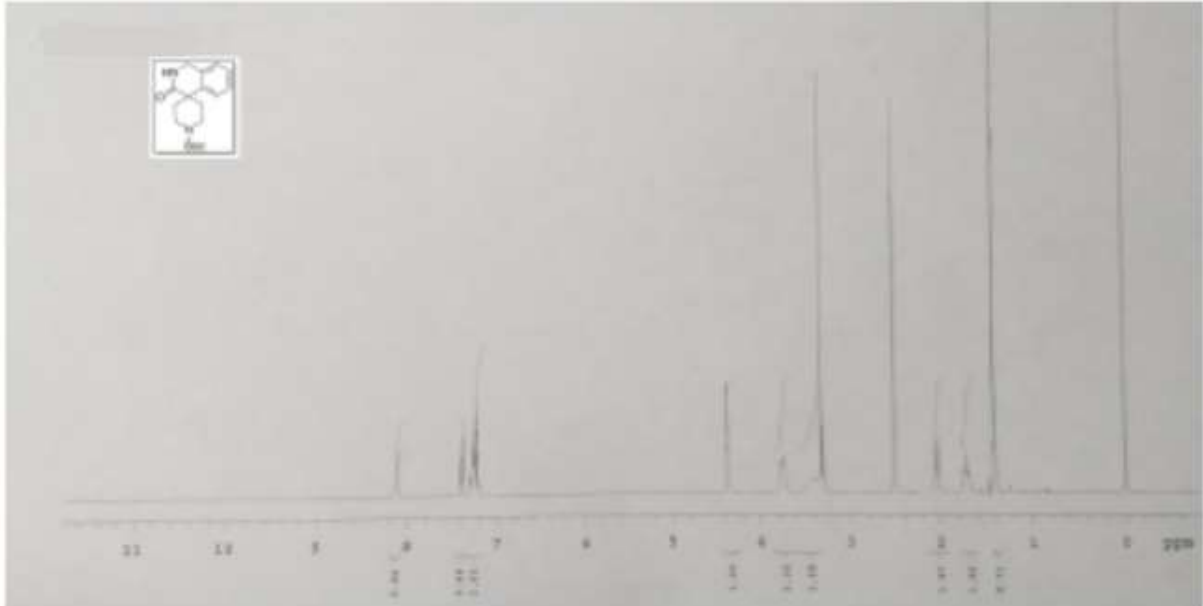

1HNMR spectra of **10a**

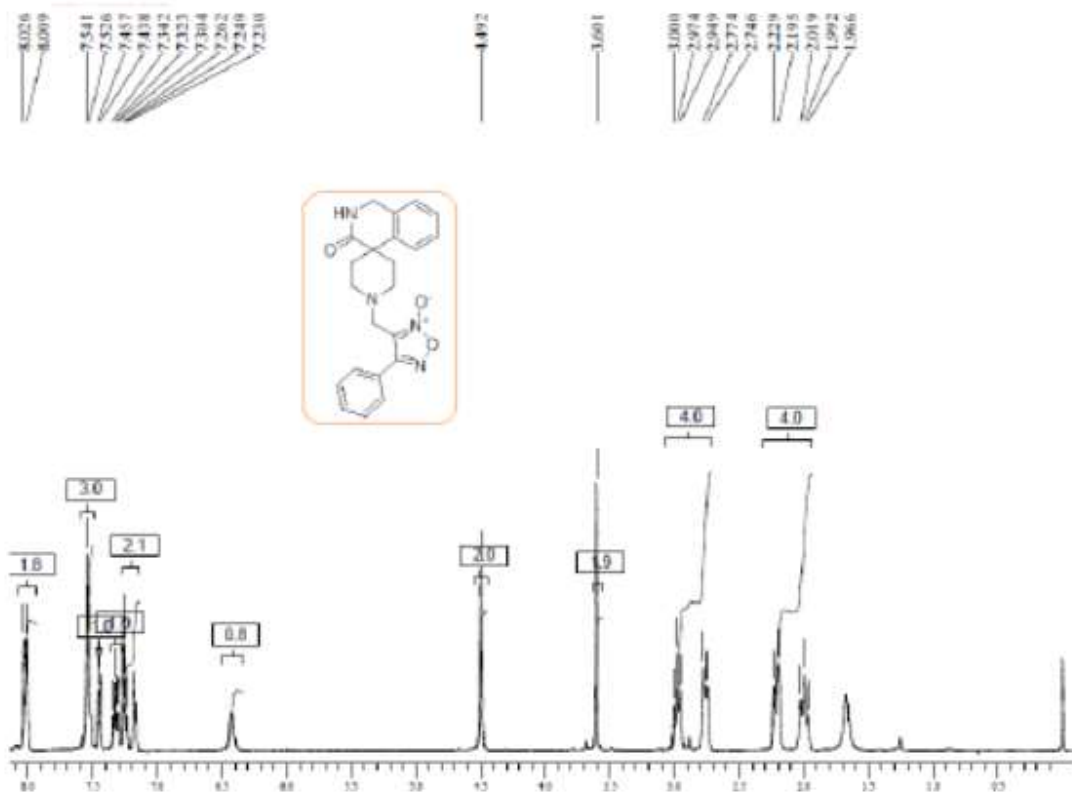

13C NMR spectra of **10a**

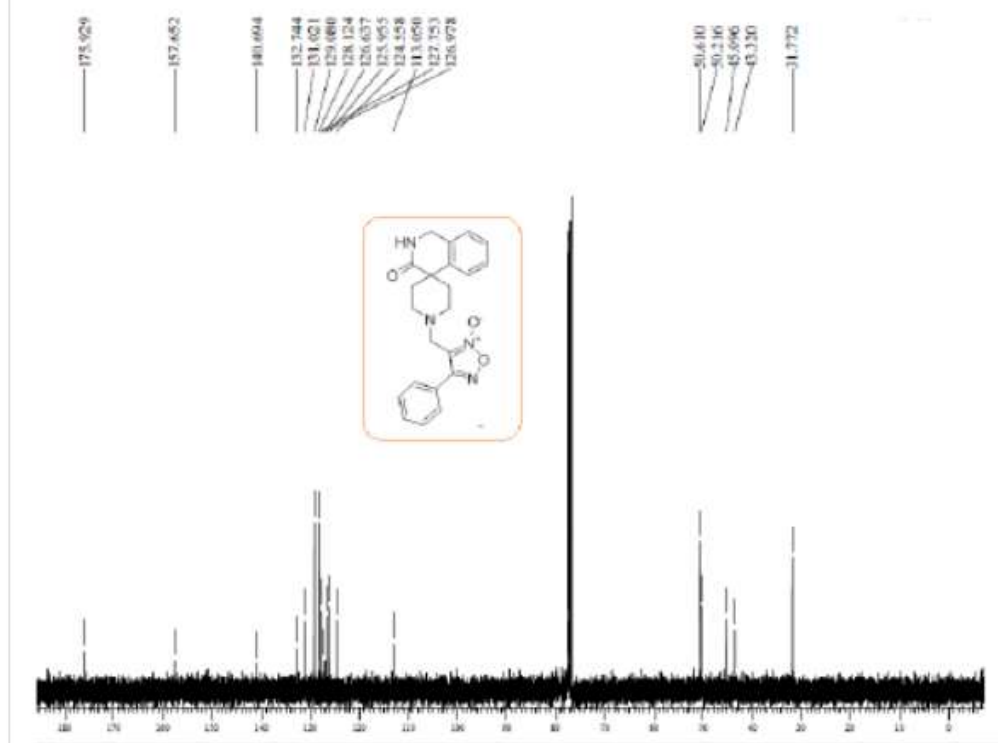

Mass spectra of **10a**

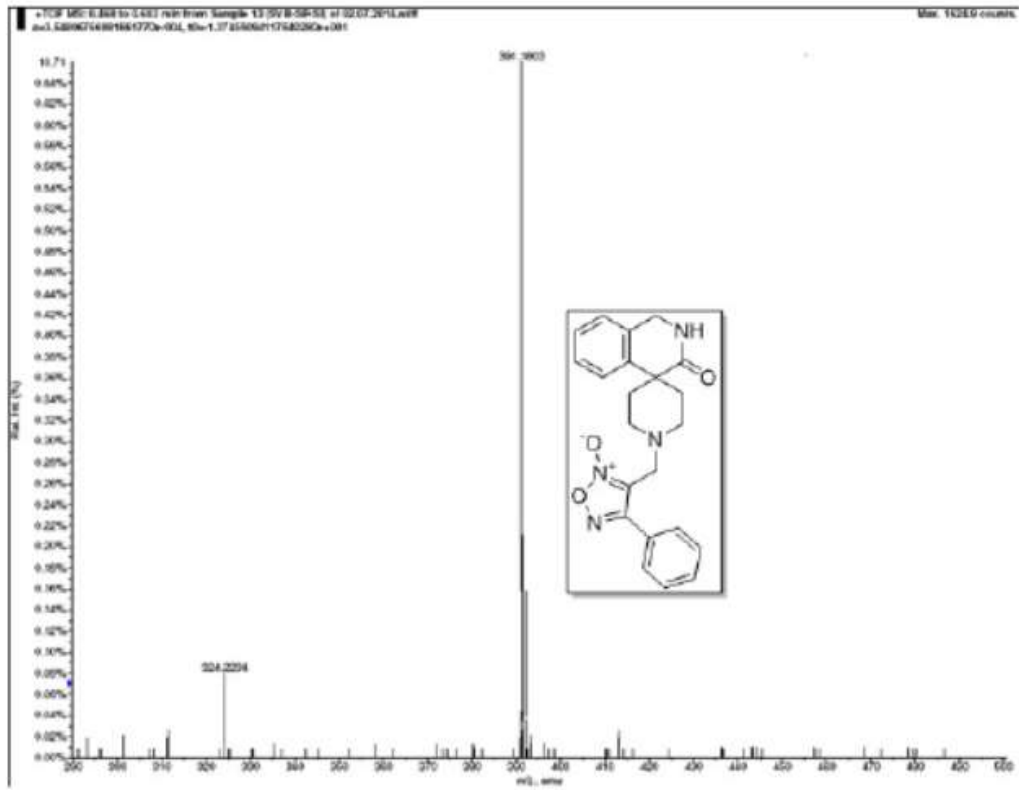

1HNMR spectra of **10b**

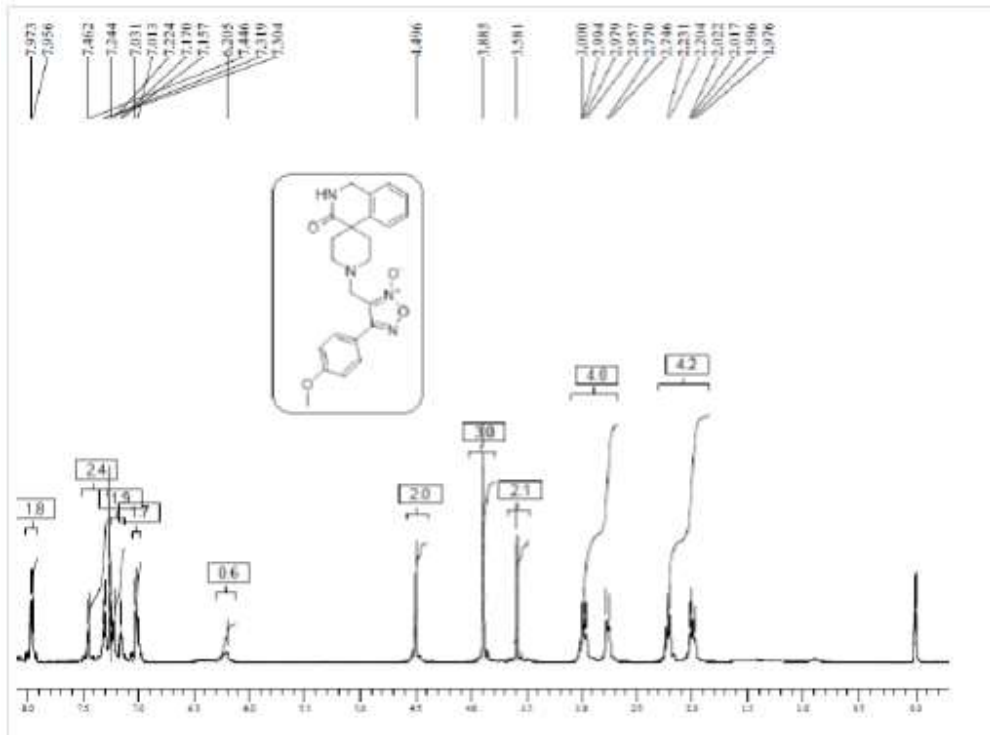

13C NMR spectra of **10b**

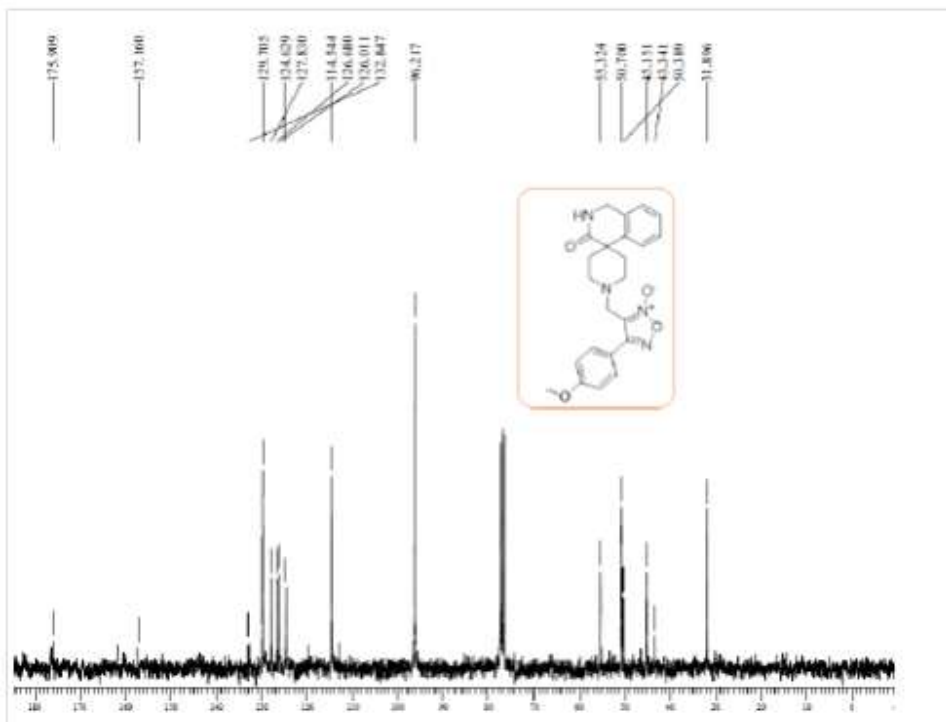

# HRMS spectra of 10b

JPAO-SPIRO-4-OME #3-12 RT: 0.03-0.12 AV: 10 NL: 2.09E8  
T: FTMS (1.1) + pESI Full ms [100.00-2000.00]

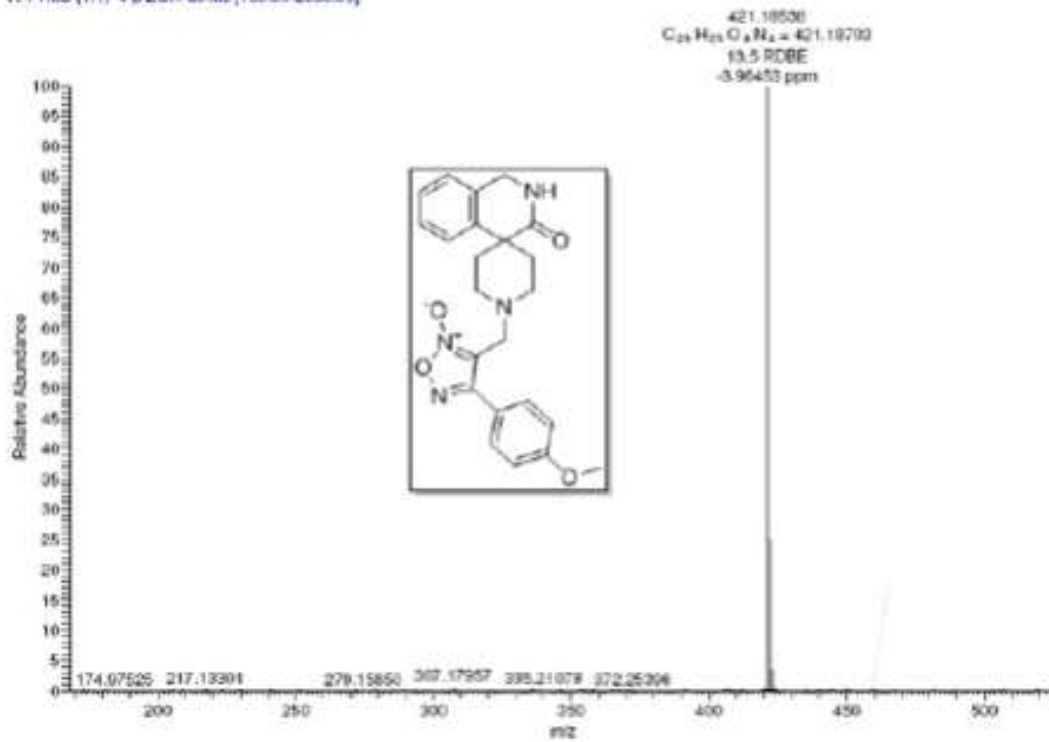



1HNMR spectra of **10c**

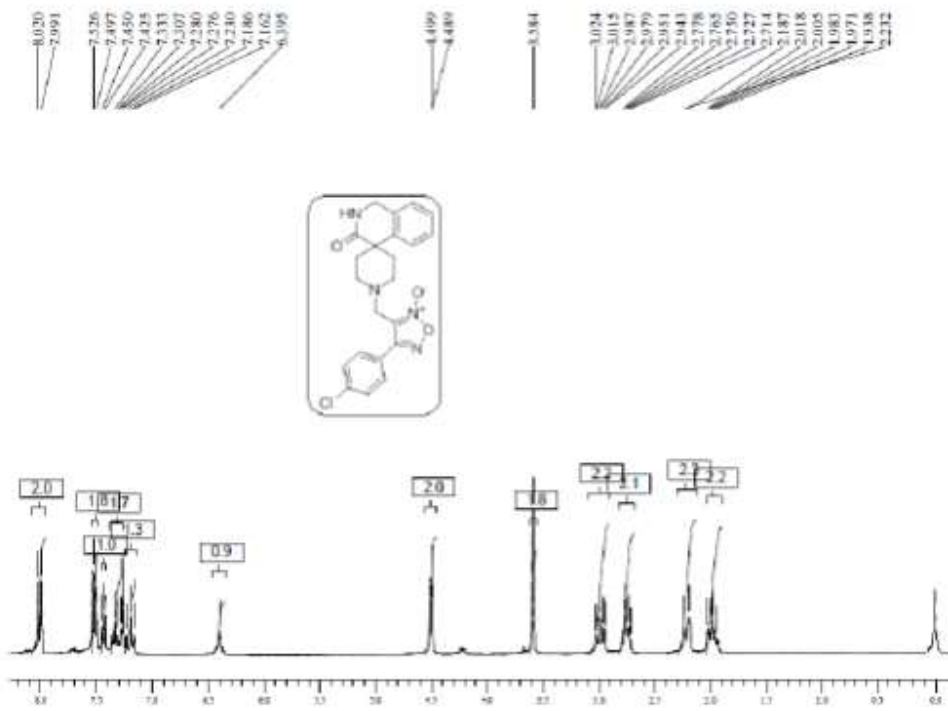

13C NMR spectra of **10c**

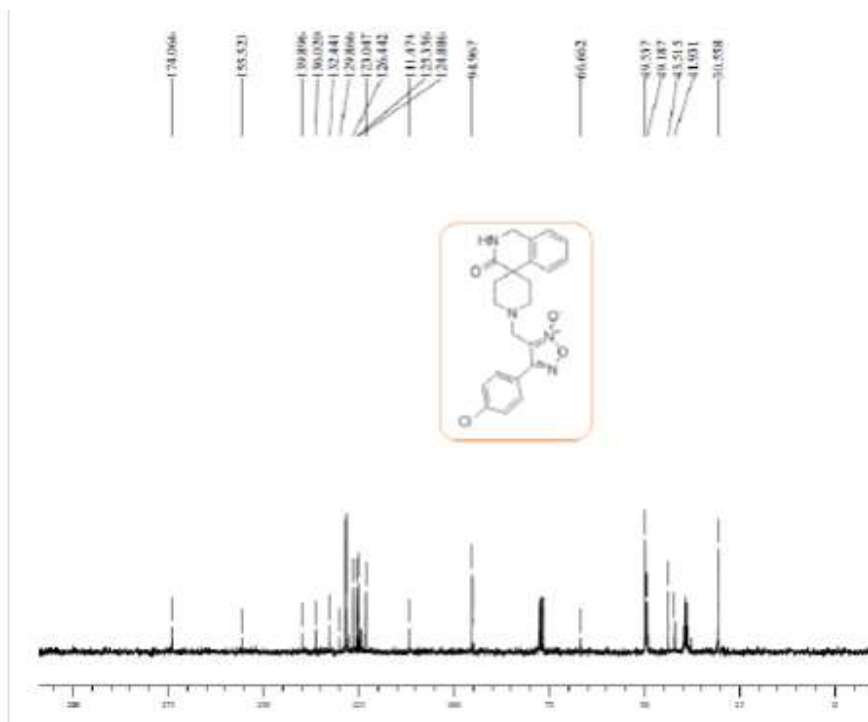

1HNMR spectra of **10d**

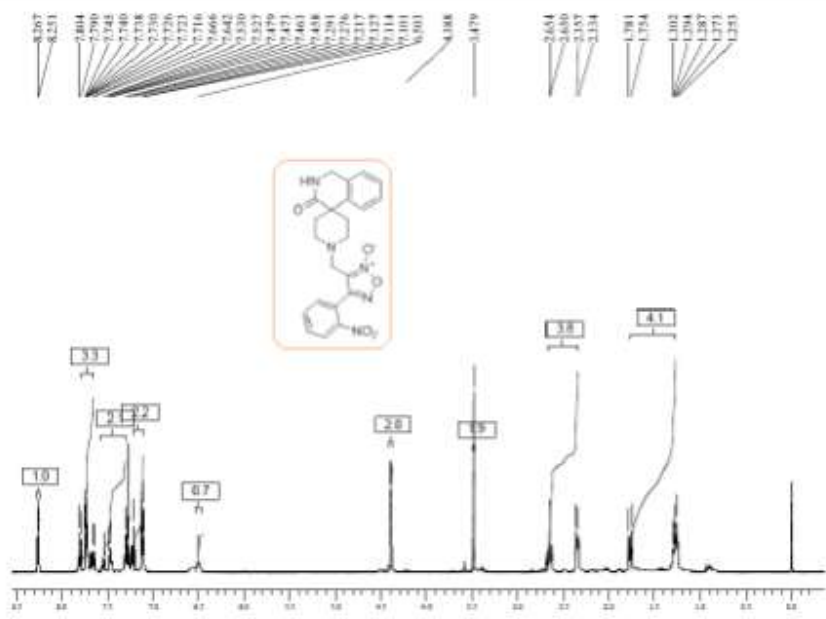

13C NMR spectra of **10d**

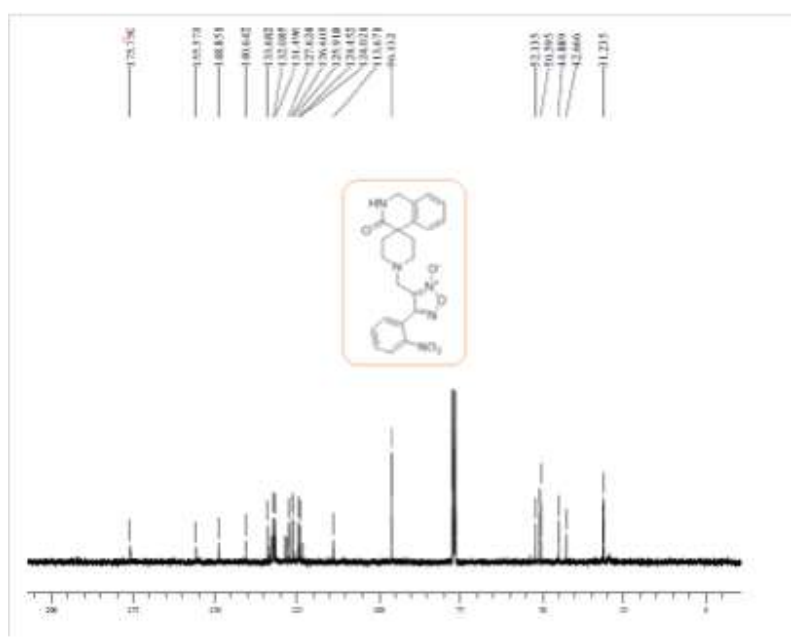

## HRMS spectra of 10d

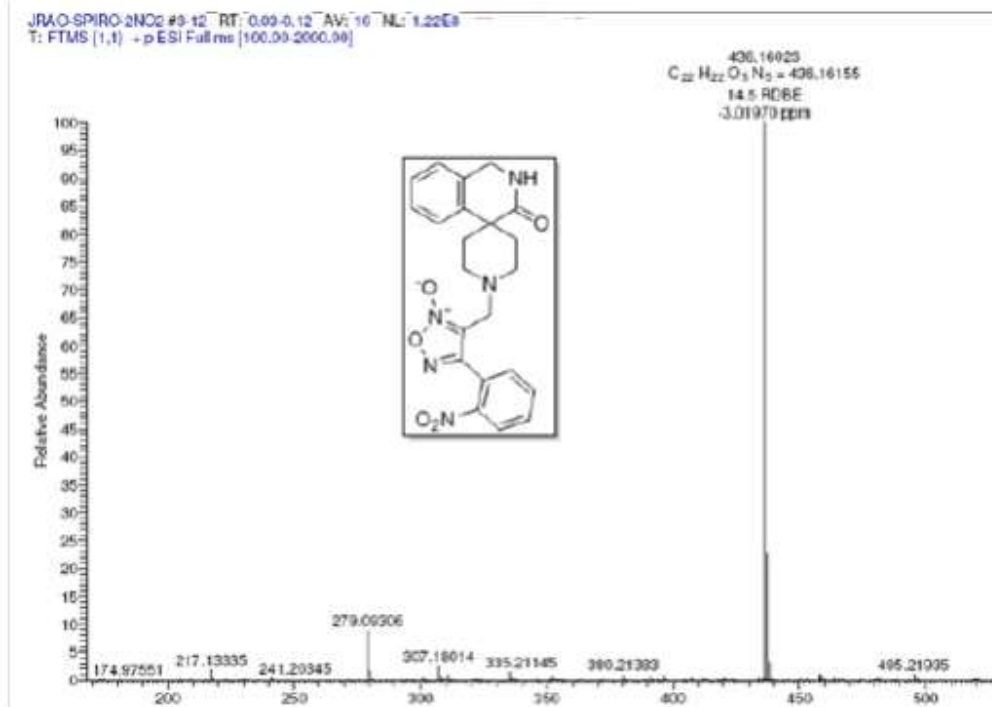

## HRMS spectra of 10e

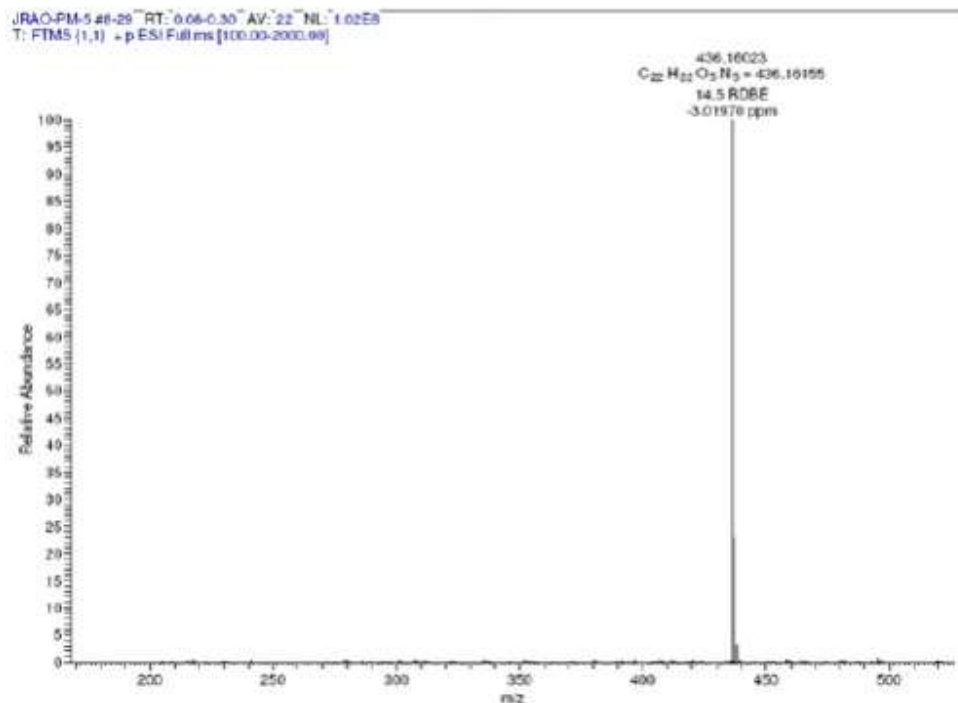

1H NMR spectra of **10f**

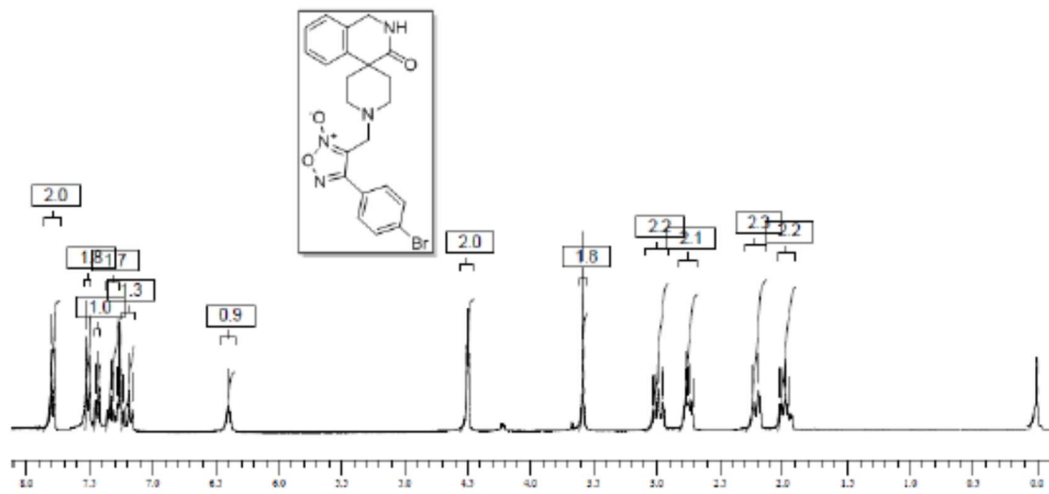

<sup>13</sup>C NMR spectra of **10f**

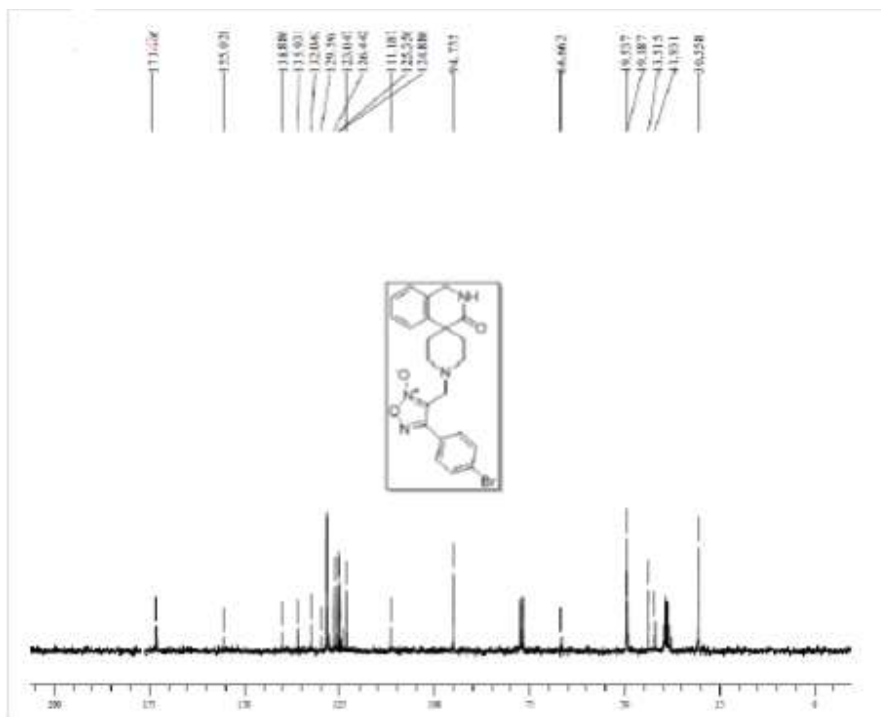

HRMS spectra of **10g**

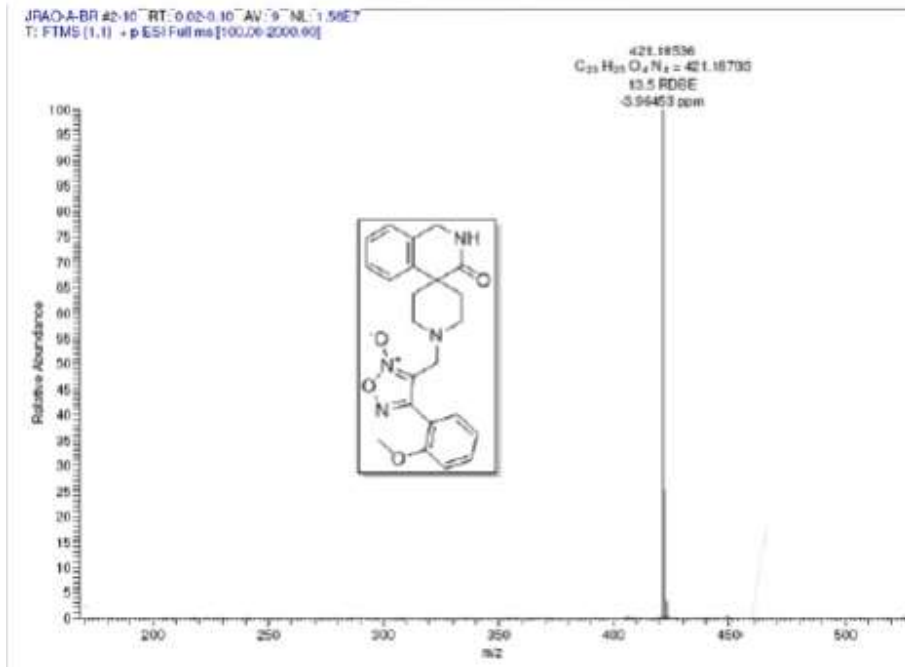

HRMS spectra of **10h**

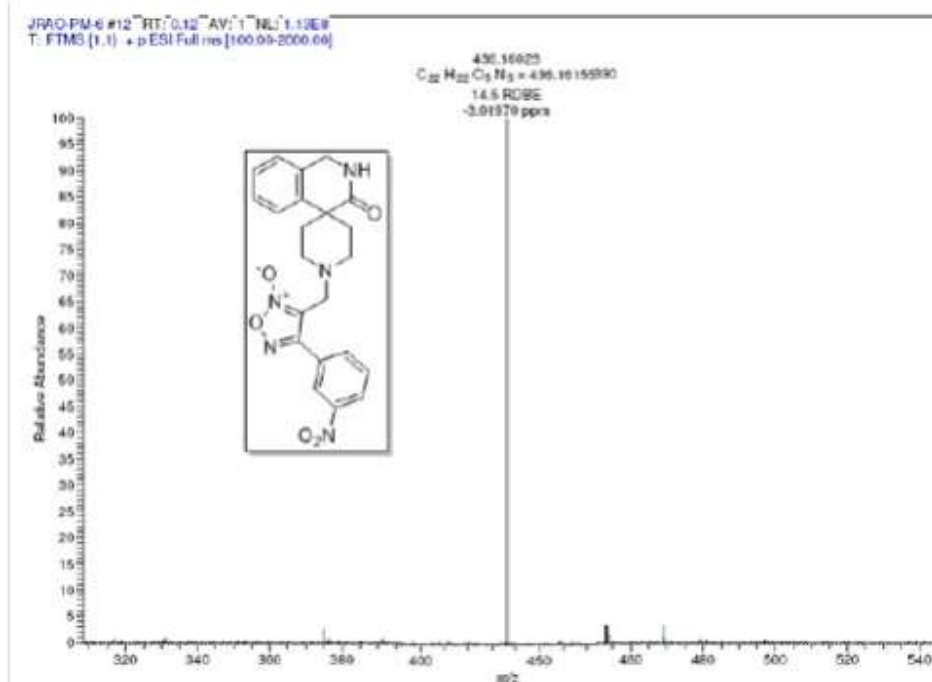

HRMS spectra of **10i**

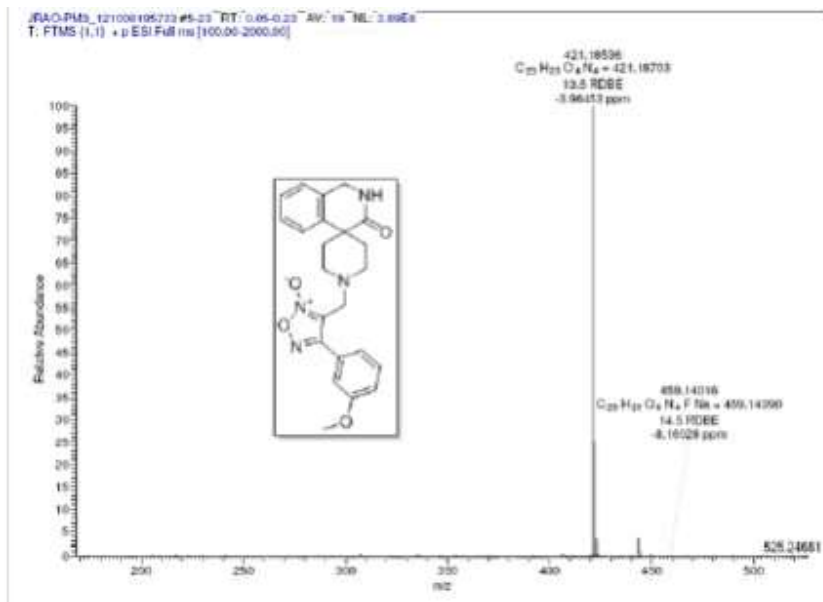

Supplement: biomedicines-08-00121-s001.pdf [file biomedicines-08-00121-s001.pdf]
